# Supplementary material
Source: publisher site journal article supplement (https://oneecosystem.pensoft.net/article/download/suppl/3931338/)
Supplement: Supplementary file 1

Dist,Crop,DryMass
0,Pea,325.37
0,Pea,315.42
0,Pea,308.93
0,Pea,351.55
7.5,Pea,661.9
7.5,Pea,601.52
7.5,Pea,534.53
7.5,Pea,521.98
15,Pea,464.37
15,Pea,301.62
15,Pea,349.56
15,Pea,379.05
30,Pea,708.22
30,Pea,426.4
30,Pea,475.41
30,Pea,635.4
0,Rape,189.79
0,Rape,295.15
0,Rape,247.01
0,Rape,329.49
7.5,Rape,502.08
7.5,Rape,444
7.5,Rape,452.84
7.5,Rape,530.55
15,Rape,537.57
15,Rape,682.29
15,Rape,518.56
15,Rape,704.12
30,Rape,543.2
30,Rape,535.2
30,Rape,685.9
30,Rape,498.83
0,Wheat,295.6
0,Wheat,354.49
0,Wheat,329.02
0,Wheat,248.81
7.5,Wheat,556.5
7.5,Wheat,655.15
7.5,Wheat,607.4
7.5,Wheat,560.38
15,Wheat,920.23
15,Wheat,1056.5
15,Wheat,1133.6
15,Wheat,1124.29
30,Wheat,788.8
30,Wheat,884.5
30,Wheat,1003.45
30,Wheat,966.46
0,Barley,336.1
0,Barley,350.91
0,Barley,347.47
0,Barley,332.89
7.5,Barley,756.2
7.5,Barley,684.05
7.5,Barley,909.16
7.5,Barley,827.74
15,Barley,941.8
15,Barley,952.4
15,Barley,1038.62
15,Barley,965.89
30,Barley,864.89
30,Barley,814.37
30,Barley,852.06
30,Barley,831.9
